# Supplementary material
Source: publisher figshare collection journal article supplement (https://geolsoc.figshare.com/ndownloader/files/28828198)
Supplement: Supplementary file 1 [file 28828198]

## Sheet: Stable isotopes
Organic carbon isotope ratios (elemental analyser Carlo Erba 1108 EA connected to an isotope ratio mass spectrometer Thermo Fisher Scientific Delta V Plus at the IDYST-UNIL.
Stable inorganic carbon and oxygen isotope (Thermo Fisher Scientific GasBench II preparation device interfaced to a Thermo Fisher Scientific Delta V continuous flow (IRMS) at the IDYST-UNIL.
Sample	Depth (m)	δ13Corg	δ13C (VPDB)	δ18O (VPDB)
RQ1	0	-26.8814	0.981564	-6.49973
RQ2	0.1		0.618207	-4.61601
RQ3	0.2	-27.1203	0.633955	-4.49458
RQ4	0.3		0.657494	-6.92424
RQ5	0.4		-0.523083	-5.45347
RQ6	0.5	-26.9695	0.724628	-5.62743
RQ7	0.6		0.652355	-5.92724
RQ8	0.7		0.47681	-4.56443
RQ9	0.8	-26.8826	0.75314	-5.22756
RQ10	0.9		-0.533028	-5.51313
RQ11	1		0.899179	-4.00061
RQ12	1.1	-27.0853	0.667937	-3.82491
RQ14	1.3		0.635447	-4.93294
RQ15	1.4	-26.9768	0.36525	-5.26393
RQ16	1.5		0.159868	-4.37854
RQ17	1.6		0.120416	-4.59368
RQ18	1.7		-0.593864	-4.35661
RQ19	1.8		0.50499	-4.32755
RQ20	1.9		0.292977	-4.37893
RQ21	2	-27.4058	0.732917	-4.01985
RQ22	2.1		-0.0942492	-3.64807
RQ23	2.2	-27.5384	0.908793	-3.89746
RQ24	2.3		0.729933	-4.00465
RQ25	2.4	-27.7091	1.53839	-1.82139
RQ26	2.5	-27.8983	-0.461341	-3.78375
RQ27	2.6	-28.1544	0.710939	-4.07663
RQ28	2.7	-28.2014	0.600108	-4.04115
RQ29	2.8	-29.1496	0.606774	-4.06167
RQ30	2.9	-27.6001	0.407895	-2.22545
RQ31	3	-27.9736	-0.523522	-2.43453
RQ32	3.1	-27.7693	0.660896	-3.86627
RQ33	3.15	-29.1641	-0.594557	-9.14414
RQ34	3.2	-31.4513	-6.75174	-17.1328
RQ35	3.25	-31.3704	-4.32311	-12.5616
RQ36	3.3	-30.3599	-1.62327	-8.12791
RQ37	3.35	-30.7185	-2.2994	-7.8378
RQ38	3.4	-30.0149	1.91008	-2.1099
RQ39	3.45	-30.2099	-3.93053	-15.1814
RQ40	3.5	-29.3747	-0.583514	-9.34286
RQ41	3.57	-29.1767	2.10796	-3.62565
RQ42	3.6	-29.3604	1.95973	-4.21784
RQ43	3.625	-28.4195	2.12856	-4.64253
RQ44	3.65	-28.3769	1.79308	-5.43782
RQ45	3.675	-28.2335	1.77418	-2.0216
RQ46	3.7	-28.0088	2.87592	-3.1845
RQ47	3.73	-27.8881	1.43194	-2.11471
RQ48	3.77	-26.9076	1.26818	-6.04391
RQ49	3.82	-27.2559	1.46268	-5.6034
RQ50	3.88		1.18321	-1.59927
RQ51	3.93		1.71548	-5.82392
RQ52	3.97	-27.6896	1.12054	-6.19185
RQ53	4	-27.6538	1.47312	-6.25502
RQ54	4.08		0.520915	-4.16824
RQ55	4.15	-28.6147	0.96384	-6.73946
RQ56	4.2	-28.3475	1.23763	-6.23578
RQ57	4.25		1.07406	-5.50755
RQ58	4.33		0.386303	-4.49824
RQ59	4.4	-28.1226	1.29751	-5.50254
RQ60	4.45		0.895698	-5.88221
RQ61	4.5		1.12081	-5.82198
RQ62	4.55	-28.37	1.15412	-5.77484
RQ63	4.6		1.36266	-5.97497
RQ64	4.65		1.20004	-5.90742
RQ65	4.7	-28.0779	0.939625	-6.27978
RQ66	4.75		0.581739	-6.1572
RQ67	4.8		1.0298	-6.06541
RQ68	4.85	-27.3981	1.05069	-6.16259
RQ69	4.9		1.09462	-6.09389
RQ70	5		0.258664	-5.21678
RQ71	5.05	-27.5598	0.989355	-5.8622
RQ72	5.1		1.04041	-7.00102
RQ73	5.15		0.91244	-5.94822
RQ74	5.2	-28.0027
RQ75	5.25		0.8647	-6.40178
RQ76	5.3		0.76408	-5.85393
RQ77	5.35	-27.4396	0.383262	-6.11703
RQ78	5.4		1.05198	-6.20334
RQ79	5.45		0.64319	-6.123
RQ80	5.5		0.398347	-2.99166
RQ81	5.55		0.387075	-5.14587
RQ82	5.6		0.143061	-2.89765
RQ83	5.65	-26.671	0.880573	-5.65055
RQ84	5.7		0.638051	-5.68144
RQ85	5.8		0.801998	-5.52556
RQ86	5.9		0.810121	-5.50622
RQ87	6		1.22786	-5.38854
RQ88	6.1		1.16901	-5.63342
RQ89	6.2		0.214674	-5.24469
RQ90	6.3		0.271865	-5.20139
RQ91	6.4		0.493665	-5.56886
RQ92	6.5		-0.432825	-5.10065

## Sheet: Mineralogy
Whole-rock mineralogy (X-TRA Thermo-ARL Diffractometer following the Kübler’s procedure (Kübler, 1987; Adatte et al., 1996), University of Lausanne, ISTE
Sample	Depth(m)	Phyllosilicates	Quartz	Feldspath-K	Plagioclase-Na	Calcite	Dolomite	Pyrite	Goethite	Ankerite	Non-quantified	detrital Index	detritus
RQ1	0	39.67	22.9989	2.79512	1.2595	28.1439	2.21436	0	0	1.54045	1.37779	2.3708	66.7235
RQ3	0.2	51.8292	22.67	3.42712	1.7252	14.67	1.09492	1.25347	0	0.46202	2.86803	5.42955	79.6516
RQ5	0.4	19.3681	10.092	0.882217	0.682743	66.9662	0.598425	0	0	0.143729	1.26657	0.463296	31.0251
RQ7	0.6	38.45	22.6516	3.8769	1.17599	28.67	2.31148	0.970163	0	0.707921	1.18596	2.30745	66.1545
RQ9	0.8	40.87	19.9771	2.53439	1.28345	33.23	1.06804	0	0	0.434451	0.602585	1.94598	64.6649
RQ11	1	45.7118	17.67	3.74263	1.12629	26.87	1.25057	0	0	0.420658	3.20803	2.54004	68.2507
RQ13	1.2	39.23	14.94	2.08068	1.13482	40.12	1.59701	0	0	0.566394	0.331092	1.43035	57.3855
RQ15	1.4	45.33	28.0471	3.73434	2.03844	15.3699	2.12451	1.12835	0	0.761088	1.46632	5.14968	79.1499
RQ17	1.6	39.0271	17.913	4.22321	0.950784	34.23	1.87471	0	0	0.46683	1.31431	1.81461	62.1141
RQ19	1.8	36.0922	28.63	3.60427	1.28905	25.7812	2.04	0.812136	0	1.63213	0.11894	2.70024	69.6155
RQ21	2	40.12	16.9	2.2955	0.962674	35.83	1.7945	0	0	0.958378	1.13895	1.68234	60.2782
RQ23	2.2	37.8298	19.56	3.26961	1.00736	32.12	2.75237	0	0	2.16646	1.29443	1.91989	61.6667
RQ25	2.4	43.88	18.919	1.83303	0.879513	25.15	6.53501	0	0	1.91955	0.883852	2.60483	65.5116
RQ26	2.5	15.7272	3.53483	0.642846	0.552772	77.8307	0.345405	0	0	0.336174	1.03008	0.262849	20.4577
RQ27	2.6	32.47	20.44	2.67	0.457387	26.98	7.56	0	0	3.89	5.53261	2.077	56.0374
RQ28	2.7	43.25	20.3881	2.98	1.93227	25.1	3.12	0	0	2.09	1.13959	2.73109	68.5504
RQ29	2.8	35.89	18.44	9.78	0.685728	27.815	2.86198	0	0	1.44058	3.08671	2.32952	64.7957
RQ30	2.9	12.537	3.56	0.746401	0.605142	78.98	0.24265	0	0	0.250925	3.0779	0.220923	17.4485
RQ31	3	9.20643	2.5643	0.652632	0.484024	85.23	0.495054	0	0	0.16638	1.20118	0.151442	12.9074
RQ32	3.1	38.23	22.12	2.11665	1.28206	33.01	1.88092	0	0	0.458025	0.902353	1.93119	63.7487
RQ33	3.15	52.19	29.56	3.87	2.77	1.85903	0	0	7.08	0	2.67097	47.5462	88.39
RQ34	3.2	55.32	30.34	4.09	1.94903	0.67403	0	0	4.76	0	2.86694	136.046	91.699
RQ35	3.25	54	29.65	6.00913	2.0639	0.518728	0	0	4.20607	0	3.55217	176.823	91.723
RQ36	3.3	56.12	25.34	4.34	2.45559	4.36	0.927445	0	4.93976	0.448875	1.06834	20.2421	88.2556
RQ37	3.35	52.43	26.89	5.17418	2.2524	6.87	1.56	0.998049	0	0.355089	3.47028	12.6269	86.7466
RQ38	3.4	11.78	3.78	0.570474	0.607045	80.56	0.356397	0	0	0.216894	2.12919	0.207765	16.7375
RQ39	3.45	61.45	25.9041	5.12378	2.58929	0.803313	0.803075	0.934472	0	0.393751	1.99816	118.344	95.0672
RQ40	3.5	59.33	23.78	4.3809	2.27364	4.33	2.02	0	0	1.34	2.54546	20.7308	89.7645
RQ41	3.57	11.1285	3.52197	0.912277	0.611966	77.45	0	1.00948	2.35645	0	3.00932	0.208841	16.1747
RQ42	3.6	48.76	24.99	6.33171	1.45915	12.1705	0.849975	0	3.89157	0.25947	1.28765	6.6999	81.5409
RQ43	3.625	21.45	8.34	1.41824	1.06954	63.4004	1.30338	0	0	0.431307	2.58708	0.50911	32.2778
RQ44	3.65	22.1215	7.81132	1.59588	0.926197	61.9099	1.3412	0	0	1.35698	2.93703	0.524229	32.4549
RQ45	3.675	13.87	5.21	0.856272	0.559583	75.64	0.505114	0.566849	0	0.12538	2.6668	0.270966	20.4959
RQ46	3.7	33.12	14.67	3.63151	1.28831	43.18	0	0	3.4095	0	0.70068	1.2207	52.7098
RQ47	3.73	12.89	3.56	0.647993	0.501478	79.32	0	0	0	0	3.08053	0.221879	17.5995
RQ48	3.77	43.23	19.2577	2.9524	0.843636	29.55	0.861278	0	2.58807	0	0.716953	2.2431	66.2837
RQ49	3.82	43.01	18.0094	3.02727	1.51315	31.32	0.861125	0.845575	0	0	1.41346	2.09323	65.5598
RQ50	3.88	11.7954	1.14431	0.645511	0.466253	85	0	0	0	0	0.948553	0.165311	14.0514
RQ51	3.93	36.5466	14.2194	2.43854	1.36285	39.7411	0	0	2.7789	0	2.91257	1.37307	54.5674
RQ52	3.97	41.3932	13.0236	2.12407	1.16313	42.1741	0	0	0	0	0.121897	1.36824	57.704
RQ53	4	35.1119	15.5724	2.77417	1.59753	41.65	0.752464	0	0	0	2.5415	1.32187	55.056
RQ54	4.08	13.0233	3.3303	0.882132	0.426673	81.44	0	0	0	0	0.897559	0.216877	17.6624
RQ55	4.15	42.8998	16.8206	4.7861	1.93472	30.9514	0.87365	0	0	0	1.73376	2.14662	66.4411
RQ56	4.2	40.78	18.33	2.77665	1.39192	33.23	0	0.866182	0	0	2.62525	1.90426	63.2786
RQ57	4.25	28.54	11.56	1.19621	0.844054	54.2087	0	0.935995	0	0	2.71501	0.77737	42.1403
RQ58	4.33	20.8845	5.08238	0.572342	0.413404	72.12	0	0	0	0	0.927373	0.373719	26.9526
RQ59	4.4	37.45	13.67	2.549	0.789062	42.67	0	0	0	0	2.87194	1.27626	54.4581
RQ60	4.45	33.23	12.56	3.30351	0.997011	45.1	0.963242	1.08097	2.38438	0	0.380893	1.11065	50.0905
RQ61	4.5	38.74	13.23	2.67097	1.25034	42.12	0.900474	0	0	0	1.08822	1.32695	55.8913
RQ63	4.6	32.67	12.45	2.81039	0.998864	50.23	0	0	0	0	0.840746	0.974104	48.9293
RQ65	4.7	42.34	12.18	2.76526	1.34057	39.12	0.777156	0.935948	0	0	0.541074	1.49862	58.6258
RQ67	4.8	37.67	14.56	1.96817	1.14237	41.98	0.821199	0.921566	0	0	0.936701	1.31826	55.3405
RQ69	4.9	33.56	17.12	1.89973	1.14074	43.4186	0	0	0	0	2.8609	1.23727	53.7205
RQ71	5.05	30.45	13.96	2.04002	1.13671	51.934	0	0	0	0	0.47927	0.916292	47.5867
RQ73	5.15	33.9431	12.5048	2.63681	1.15122	46.3846	0	0.820232	0	0	2.55922	1.08303	50.236
RQ74	5.2	52.67	22.65	5.34	1.72027	2.24792	0.843211	0	11.55	0	2.9786	36.6474	82.3803
RQ75	5.25	46.22	19.59	2.65113	1.5842	23.5657	0	1.60698	4.48715	0	0.294825	2.97234	70.0453
RQ77	5.35	54.1668	14.1082	2.65941	1.21611	23.8839	0.670553	0.810393	0	0	2.48474	3.02089	72.1505
RQ79	5.45	48.73	17.0753	3.17158	1.8546	28.6798	0	0	0	0	0.488749	2.46974	70.8315
RQ81	5.55	30.33	10.67	1.80437	0.934581	53.8537	0	0	0	0	2.40734	0.812181	43.739
RQ83	5.65	41.83	10.5243	2.0934	1.10566	43.21	0.775147	0	0	0	0.461458	1.28566	55.5534
RQ85	5.8	45.78	14.05	2.13189	0.973069	33.78	1.08952	0	0	0.416595	1.77893	1.86308	62.935
RQ87	6	50.0574	13.2845	3.27048	1.42518	24.8178	2.36658	0	2.46061	0.783887	1.53364	2.74148	68.0375
RQ89	6.2	41.09	9.13616	5.28555	0.948799	40.7315	0.595192	0	0	0.184647	2.0281	1.38616	56.4605
RQ91	6.4	53.23	15.78	2.08603	1.31904	22.76	0.73815	0	1.89396	0	2.19281	3.18168	72.4151

## Sheet: Phosphorus
Total phosphorus (ascorbic acid molybdate blue method; Eaton et al., (1995) at the ISTE-UNIL. Quantification with an UV/Vis Perkin Elmer Lambda 25 spectrophotometer.
Sample	Depth(m)	Ptot (ppm)	TOC %	TOC (ppm)	C (mol)	Ptot (mol)	Corg/Ptot (Molar)	Sed. Rate (m/kyr)	P MAR
RQ1	0	169.805	0.398502	3985.02	0.331789	0.00548223	60.5208	0.00114059	0.484195
RQ3	0.2	226.764	0.597309	5973.09	0.497314	0.00732116	67.9283	0.000786375	0.445803
RQ5	0.4	99.1285	0.173821	1738.21	0.144722	0.0032004	45.2198	0.0025757	0.638313
RQ7	0.6	124.057	0.42945	4294.5	0.357556	0.00400523	89.2722	0.000968398	0.300342
RQ9	0.8	178.302	0.404316	4043.16	0.33663	0.00575656	58.4777	0.00105196	0.468915
RQ11	1	265.347	0.456341	4563.41	0.379945	0.00856684	44.3507	0.00090978	0.603519
RQ13	1.2	887.297	0.351006	3510.06	0.292245	0.0286467	10.2017	0.00114056	2.53004
RQ15	1.4	280.454	0.468962	4689.62	0.390453	0.00905456	43.1223	0.000797896	0.559433
RQ17	1.6	1008.68	0.347104	3471.04	0.288996	0.0325657	8.87425	0.00121203	3.05637
RQ19	1.8	160.322	0.397738	3977.38	0.331153	0.00517605	63.9779	0.000987925	0.395965
RQ21	2	174.209	0.302393	3023.93	0.25177	0.0056244	44.7639	0.00124792	0.543498
RQ23	2.2	218.997	0.400847	4008.47	0.333741	0.0070704	47.2026	0.00111426	0.610047
RQ25	2.4	124.473	0.364583	3645.83	0.303548	0.00401864	75.535	0.00108206	0.336716
RQ26	2.5	3909.24	0.126982	1269.82	0.105724	0.126211	0.837674	0.00407975	39.8718
RQ27	2.6	150.052	0.372527	3725.27	0.310163	0.00484448	64.024	0.00120255	0.451113
RQ28	2.7	147.419	0.372903	3729.03	0.310475	0.00475949	65.2329	0.00110257	0.406349
RQ29	2.8	132.491	0.339156	3391.56	0.282378	0.00427754	66.0142	0.00117476	0.389113
RQ30	2.9	6042.8	0.10454	1045.4	0.087039	0.195094	0.446138	0.00633155	95.6507
RQ31	3	102.898	0.100471	1004.71	0.0836516	0.0033221	25.1803	0.0158268	4.07137
RQ32	3.1	904.808	0.428213	4282.13	0.356526	0.0292121	12.2048	0.00113111	2.55858
RQ33	3.15	1399.2	2.08349	20834.9	1.73469	0.0451736	38.4005	0.000686891	2.40274
RQ34	3.2	1040.11	4.02866	40286.6	3.35423	0.0335805	99.8863	0.000679306	1.76639
RQ35	3.25	1141.73	3.43263	34326.3	2.85798	0.0368613	77.5333	0.000671986	1.91807
RQ36	3.3	1018.58	7.58559	75855.9	6.31569	0.0328852	192.052	0.00072188	1.83823
RQ37	3.35	1956.35	5.83223	58322.3	4.85586	0.0631616	76.88	0.000706331	3.45458
RQ38	3.4	248.414	0.573607	5736.07	0.47758	0.00802015	59.5475	0.00391798	2.43321
RQ39	3.45	1394.63	3.67559	36755.9	3.06027	0.0450262	67.9663	0.000671704	2.34195
RQ40	3.5	930.238	4.5182	45182	3.76181	0.0300331	125.256	0.000687164	1.59807
RQ41	3.57	231.221	0.560659	5606.59	0.4668	0.00746505	62.5314	0.00299368	1.7305
RQ42	3.6	627.043	3.8798	38798	3.23028	0.0202443	159.565	0.000771179	1.20891
RQ43	3.625	204.431	0.909037	9090.37	0.756856	0.00660012	114.673	0.00345052	1.76348
RQ44	3.65	258.39	0.814561	8145.61	0.678196	0.00834221	81.2969	0.00357621	2.31014
RQ45	3.675	167.695	0.448779	4487.79	0.373649	0.00541409	69.0142	0.0053876	2.25868
RQ46	3.7	438.517	2.67567	26756.7	2.22774	0.0141577	157.352	0.00129336	1.4179
RQ47	3.73	162.941	0.272507	2725.07	0.226887	0.00526061	43.1295	0.00698087	2.84367
RQ48	3.77	461.048	5.86843	58684.3	4.886	0.0148851	328.247	0.000929174	1.07098
RQ49	3.82	443.717	4.92703	49270.3	4.1022	0.0143256	286.355	0.000972516	1.07881
RQ50	3.88	172.096	0.300904	3009.04	0.25053	0.00555619	45.0903	0.00390414	1.67972
RQ51	3.93	3499.47	4.61126	46112.6	3.83929	0.112982	33.9815	0.00105961	9.27021
RQ52	3.97	2463.5	5.5317	55317	4.60565	0.0795349	57.9072	0.00105819	6.51711
RQ53	4	1271.97	5.2212	52212	4.34713	0.0410659	105.857	0.00103361	3.28678
RQ54	4.08	305.602	1.32334	13233.4	1.1018	0.00986649	111.671	0.00460555	3.51867
RQ56	4.2	1143.77	4.37741	43774.1	3.64459	0.0369272	98.6968	0.000970172	2.77414
RQ57	4.25	835.31	3.22311	32231.1	2.68354	0.0269683	99.507	0.00139286	2.90866
RQ59	4.4	4922.34	2.84798	28479.8	2.37121	0.15892	14.9208	0.00119736	14.7345
RQ61	4.5	991.627	4.14229	41422.9	3.44883	0.0320151	107.725	0.00118132	2.92857
RQ63	4.6	665.333	2.88276	28827.6	2.40016	0.0214805	111.736	0.00133843	2.22625
RQ65	4.7	824.529	3.88554	38855.4	3.23507	0.0266203	121.526	0.00107053	2.2067
RQ67	4.8	934.72	4.06111	40611.1	3.38124	0.0301778	112.044	0.00114724	2.68086
RQ69	4.9	899.895	3.31872	33187.2	2.76314	0.0290535	95.1052	0.00126697	2.85034
RQ71	5.05	766.042	3.76436	37643.6	3.13417	0.024732	126.725	0.00149108	2.85557
RQ73	5.15	2227.09	3.17856	31785.6	2.64644	0.0719024	36.806	0.00100299	5.58435
RQ75	5.25	1484.93	2.49666	24966.6	2.07869	0.0479416	43.3589	0.000792452	2.94184
RQ77	5.35	503.976	1.17757	11775.7	0.98043	0.016271	60.2561	0.000825894	1.04058
RQ79	5.45	495.221	1.87351	18735.1	1.55987	0.0159884	97.5625	0.000846407	1.0479
RQ81	5.55	832.055	1.39932	13993.2	1.16506	0.0268632	43.37	0.00157769	3.28181
RQ83	5.65	3876.08	0.922997	9229.97	0.768479	0.125141	6.14091	0.00117955	11.43
RQ85	5.8	1424.92	1.08468	10846.8	0.903098	0.0460042	19.6308	0.000958997	3.41625
RQ87	6	2194.96	0.740562	7405.62	0.616585	0.0708652	8.70082	0.000973937	5.34438
RQ89	6.2	1077.54	0.439803	4398.03	0.366176	0.0347889	10.5256	0.00114567	3.08626
RQ91	6.4	614.573	0.54464	5446.4	0.453463	0.0198417	22.854	0.000829814	1.27495

## Sheet: Rock Eval
Rock-Eval pyrolysis (Rock-Eval 6, University of Lausanne, ISTE)
Sample	Depth (m)	PC [%]	RC [%]	TOC [%]	MINC [%]	HI [mg HC/g TOC]	OI [mg CO2/g TOC]	Tmax [°C]	S1 [mg HC/g]	S2a [mg HC/g]	S2b [mg HC/g]	S3	Quant (mg)
RQ 1	0	0.0382894	0.360212	0.398502	5.2209	89.4103	66.2065	430.848	0.0183241	0.356302	0	0.263834	65.2
RQ 2	0.1	0.0517991	0.505019	0.556818	2.59544	80.3481	86.0137	431.826	0.0193192	0.447393	0	0.47894	63.6
RQ 3	0.2	0.0604615	0.536848	0.597309	2.16285	81.6139	112.941	431.804	0.0192964	0.487487	0	0.674609	65.1
RQ 4	0.3	0.0371058	0.283039	0.320145	7.0023	95.0566	122.19	430.783	0.0142015	0.304319	0	0.391184	61.6
RQ 5	0.4	0.0211486	0.152672	0.173821	9.00103	93.2632	146.322	431.761	0.00911874	0.162111	0	0.254338	64.6
RQ 6	0.5	0.0605799	0.422822	0.483401	4.37808	90.0196	174.079	430.739	0.0182158	0.435156	0	0.841501	66.6
RQ 7	0.6	0.0454404	0.384009	0.42945	4.01945	84.7325	120.792	431.717	0.0131402	0.363884	0	0.51874	65.1
RQ 8	0.7	0.0457578	0.409631	0.455389	3.43804	79.811	116.092	429.696	0.0141342	0.36345	0	0.52867	62.9
RQ 9	0.8	0.0417032	0.362613	0.404316	4.65265	74.8213	142.902	430.674	0.0100838	0.302515	0	0.577778	77.6
RQ 10	0.9	0.0213717	0.164332	0.185704	8.82373	75.9302	179.343	431.652	0.00705025	0.141005	0	0.333047	67
RQ 11	1	0.0509686	0.405372	0.456341	3.50504	77.1554	165.328	429.63	0.0140837	0.352092	0	0.754457	68
RQ 12	1.1	0.0417066	0.339974	0.38168	3.90832	78.975	151.5	430.609	0.0110525	0.301432	0	0.578247	63.1
RQ 13	1.2	0.0384621	0.312544	0.351006	5.22644	77.1964	156.405	429.587	0.0120428	0.270964	0	0.548993	68.4
RQ 14	1.3	0.0446484	0.353262	0.39791	4.61611	73.0534	179.901	429.565	0.0120284	0.290687	0	0.715845	66.8
RQ 15	1.4	0.0539828	0.414979	0.468962	2.31934	76.8547	177.785	429.543	0.0160186	0.360419	0	0.833743	67.2
RQ 16	1.5	0.0395404	0.385908	0.425448	4.15167	77.5623	96.8575	430.522	0.0109996	0.329987	0	0.412079	64.4
RQ 17	1.6	0.0371813	0.309923	0.347104	5.62411	83.4448	130.061	431.5	0.00998759	0.28964	0	0.451446	69.1
RQ 18	1.7	0.0170483	0.175177	0.192226	8.66849	67.4636	107.244	428.478	0.00798045	0.129682	0	0.206151	73.7
RQ 19	1.8	0.0374468	0.360291	0.397738	4.18007	80.1616	91.3455	429.457	0.0129526	0.318833	0	0.363316	65.3
RQ 20	1.9	0.025404	0.221549	0.246953	7.40053	84.6241	107.386	430.435	0.00995151	0.208982	0	0.265194	72.9
RQ 21	2	0.0295702	0.272823	0.302393	5.81181	82.1734	97.4689	429.413	0.0109334	0.248487	0	0.294739	64.6
RQ 22	2.1	0.0178006	0.129387	0.147188	9.94531	114.661	80.1205	429.391	0.00694921	0.168767	0	0.117928	71
RQ 23	2.2	0.0414893	0.359357	0.400847	5.06143	79.1558	125.067	427.37	0.0178478	0.317293	0	0.501327	71.8
RQ 24	2.3	0.039132	0.337767	0.376899	4.31505	81.4556	120.006	428.348	0.0158454	0.307005	0	0.452299	62.5
RQ25	2.4	0.0420887	0.322494	0.364583	4.86061	88.2127	140.45	427	0.017229	0.321608	0	0.512058	60.5
RQ26	2.5	0.0239083	0.103074	0.126982	10.1063	162.336	177.109	437	0.00801647	0.206138	0	0.224896	75
RQ27	2.6	0.0424361	0.330091	0.372527	5.57112	101.147	95.8693	427	0.0171273	0.3768	0	0.357139	62.8
RQ28	2.7	0.0401651	0.332737	0.372903	4.99168	97.6922	87.4042	429	0.0125227	0.364297	0	0.325933	71.9
RQ29	2.8	0.0373397	0.301816	0.339156	5.42395	100.399	86.9327	427	0.0124854	0.340511	0	0.294837	66
RQ30	2.9	0.0190308	0.0855091	0.10454	10.7788	129.9	252.395	429	0.00678987	0.135797	0	0.263854	64.8
RQ31	3	0.0155453	0.0849262	0.100471	11.5073	112.296	201.642	429	0.00789778	0.112825	0	0.202593	60.9
RQ32	3.1	0.0568417	0.371371	0.428213	5.16086	86.6869	212.51	426	0.0146232	0.371205	0	0.909994	74.4
RQ33	3.15	0.295569	1.78792	2.08349	0.569397	97.9646	210.231	427	0.0807459	2.04108	0	4.38013	63.4
RQ34	3.2	0.778033	3.25063	4.02866	0.210985	205.373	70.2655	423	0.169948	8.27379	0	2.83076	68.9
RQ35	3.25	0.694403	2.73823	3.43263	0.159342	208.479	93.7384	426	0.152712	7.1563	0	3.21769	70.5
RQ36	3.3	2.65836	4.92722	7.58559	0.451022	406.248	29.3734	419	0.48008	30.8163	0	2.22815	72.4
RQ37	3.35	1.66234	4.16989	5.83223	0.427221	325.406	38.8204	421	0.305782	18.9784	0	2.26409	68.9
RQ38	3.4	0.176602	0.397005	0.573607	9.97496	350.452	41.8385	426	0.038658	2.01022	0	0.239989	77.9
RQ39	3.45	0.786809	2.88878	3.67559	0.125364	238.463	49.693	428	0.114517	8.76494	0	1.82651	69.1
RQ40	3.5	1.05148	3.46672	4.5182	0.281564	259.479	54.903	427	0.129532	11.7238	0	2.48063	64.3
RQ41	3.57	0.0636839	0.496976	0.560659	9.37106	75.1719	176.848	428	0.0200193	0.421458	0	0.991515	65.8
RQ42	3.6	0.788536	3.09126	3.8798	1.57628	226.304	48.2632	427	0.105025	8.78012	0	1.87251	58
RQ43	3.625	0.224466	0.684571	0.909037	9.66903	276.311	48.9077	427	0.0465544	2.51177	0	0.444589	63.9
RQ44	3.65	0.236338	0.578223	0.814561	9.75863	330.51	38.6882	427	0.0516903	2.6922	0	0.315139	64.1
RQ45	3.675	0.114006	0.334772	0.448779	10.5249	274.472	74.3703	431	0.0321331	1.23177	0	0.333758	62.6
RQ46	3.7	0.556966	2.1187	2.67567	5.7432	228.142	59.9737	429	0.0788342	6.10432	0	1.6047	62.4
RQ47	3.73	0.0789364	0.193571	0.272507	10.8715	311.052	85.8964	430	0.0264887	0.847639	0	0.234074	62.4
RQ48	3.77	2.06794	3.80049	5.86843	3.03159	411.027	29.6525	426	0.222346	24.1208	0	1.74013	56.6
RQ49	3.82	1.91218	3.01486	4.92703	3.51312	456.247	21.8298	423	0.205407	22.4795	0	1.07556	62.7
RQ50	3.88	0.0790909	0.221814	0.300904	10.0008	277.089	93.0809	433	0.0270976	0.833772	0	0.280085	73
RQ51	3.93	1.34157	3.26968	4.61126	4.20041	335.121	37.3679	427	0.144065	15.4533	0	1.72313	68.2
RQ52	3.97	2.17089	3.36081	5.5317	4.08015	461.518	21.7826	427	0.229574	25.5298	0	1.20495	69.4
RQ53	4	1.6259	3.5953	5.2212	3.94475	360.703	34.8675	429	0.157961	18.8331	0	1.8205	64.6
RQ54	4.08	0.55345	0.769889	1.32334	10.1777	488.539	30.1502	427	0.0719462	6.46503	0	0.39899	72.2
RQ55	4.15	2.29633	3.37392	5.67025	2.50582	478.52	15.863	427	0.237782	27.1333	0	0.899469	65.5
RQ56	4.2	1.37219	3.00522	4.37741	3.56001	367.991	20.9104	428	0.123218	16.1085	0	0.915333	71.3
RQ 57	4.25	1.21414	2.00897	3.22311	6.10181	443.106	20.0583	429.652	0.133955	14.2818	0	0.646502	63.4
RQ 58	4.33	0.504669	0.910854	1.41552	9.8099	413.828	35.3114	429.609	0.0582769	5.85783	0	0.49984	60.2
RQ 59	4.4	0.602578	2.24541	2.84798	5.24622	235.107	52.6805	428.565	0.0711681	6.69582	0	1.50033	74.5
RQ 60	4.45	0.686331	2.33053	3.01686	4.61566	256.217	45.5306	427.522	0.0879967	7.72971	0	1.3736	74.5
RQ 61	4.5	1.65569	2.4866	4.14229	5.00372	468.159	26.3056	428.478	0.197516	19.3925	0	1.08965	63.9
RQ 62	4.55	1.01818	1.85149	2.86967	5.99006	411.977	35.2537	429.435	0.112452	11.8224	0	1.01167	70.4
RQ 63	4.6	1.02701	1.85575	2.88276	5.91836	415.659	31.0218	429.391	0.097289	11.9824	0	0.894284	68.1
RQ 64	4.65	1.26275	2.29011	3.55286	5.81979	415.607	28.7821	429.348	0.111908	14.766	0	1.02259	70.1
RQ 65	4.7	1.36115	2.52439	3.88554	4.36144	408.848	30.3831	430.304	0.125468	15.886	0	1.18055	61.3
RQ 66	4.75	2.11388	2.98456	5.09844	3.71611	488.469	22.2023	429.261	0.192178	24.9043	0	1.13197	65.8
RQ 67	4.8	1.59888	2.46222	4.06111	4.82025	462.377	26.9184	430.217	0.126823	18.7776	0	1.09318	57.7
RQ 68	4.85	1.99303	2.8965	4.88953	4.72063	478.371	25.7957	428.174	0.207912	23.3901	0	1.26129	58.2
RQ 69	4.9	1.10131	2.21741	3.31872	5.54225	385.874	32.3812	428.13	0.109571	12.8061	0	1.07464	62.3
RQ 70	5	0.660174	1.26371	1.92388	8.73496	399.212	30.764	428.087	0.0790483	7.68037	0	0.591864	61.5
RQ 71	5.05	1.4935	2.27086	3.76436	6.40021	463.946	29.1029	429.043	0.169389	17.4646	0	1.09554	77
RQ 72	5.1	2.28507	3.34798	5.63304	5.03283	476.135	24.2852	430.895	0.260563	26.8209	0	1.368	63
RQ 73	5.15	0.755739	2.42282	3.17856	3.96303	269.03	44.3647	431.789	0.0906496	8.55128	0	1.41016	78.5
RQ 74	5.2	0.329709	2.29793	2.62764	0.402465	82.126	201.971	430.684	0.0705881	2.15798	0	5.30707	65.3
RQ 75	5.25	0.321583	2.17507	2.49666	2.00976	122.121	94.6003	436.579	0.0494697	3.04895	0	2.36184	72.1
RQ 76	5.3	0.288868	1.61353	1.90239	2.96785	158.863	67.793	437.474	0.0343661	3.0222	0	1.28969	66
RQ 77	5.35	0.148036	1.02953	1.17757	2.5607	122.889	76.4967	436.368	0.0404781	1.44709	0	0.900798	60.1
RQ 78	5.4	0.222968	1.21768	1.44065	3.05096	163.154	65.3899	437.263	0.0263415	2.35048	0	0.94204	70.1
RQ 79	5.45	0.28567	1.58784	1.87351	2.70261	162.42	59.1867	437.158	0.0344869	3.04296	0	1.10887	62.3
RQ 80	5.5	0.117872	0.273073	0.390945	10.4255	342.878	47.0064	435.053	0.0192946	1.34046	0	0.183769	76.3
RQ 81	5.55	0.242535	1.15678	1.39932	6.96699	185.273	67.2522	435.947	0.0203337	2.59255	0	0.94107	75.6
RQ 82	5.6	0.0866878	0.348504	0.435192	11.1092	210.501	80.5007	435.842	0.0132323	0.916084	0	0.350332	62.9
RQ 83	5.65	0.11711	0.805887	0.922997	5.38041	128.072	68.7407	437.737	0.0203811	1.1821	0	0.634475	71.1
RQ 84	5.7	0.199638	1.2437	1.44334	3.75422	143.492	64.4429	433.632	0.0285667	2.07108	0	0.930131	69.5
RQ 85	5.8	0.125517	0.959167	1.08468	3.86302	112.06	76.9576	434.526	0.0224713	1.21549	0	0.834747	64.5
RQ 86	5.9	0.100261	0.825062	0.925323	3.65978	110.513	53.226	432.421	0.0235199	1.02261	0	0.492513	70.8
RQ 87	6	0.0784223	0.66214	0.740562	4.02722	102.301	69.374	433.316	0.0184282	0.757604	0	0.513757	75.2
RQ 88	6.1	0.0615191	0.504864	0.566383	5.51254	101.342	80.4833	431.211	0.0174245	0.573985	0	0.455844	64.3
RQ 89	6.2	0.047871	0.391932	0.439803	5.2458	79.3295	149.157	433.105	0.0123139	0.348893	0	0.655997	62.3
RQ 90	6.3	0.0578922	0.496122	0.554015	4.22544	89.0091	104.366	431	0.0143828	0.493124	0	0.578205	63.2
RQ 91	6.4	0.0650159	0.479624	0.54464	2.68063	77.4263	194.599	430.895	0.0133708	0.421695	0	1.05987	67.6
RQ 92	6.5	0.0549896	0.439207	0.494196	3.83865	83.3441	146.106	431.789	0.0133862	0.411883	0	0.722048	60.2

## Sheet: Mercury
Mercury (Zeeman R-915F (Lumex, St-Petersburg, Russia) high-frequency atomic absorption spectrometer set in Mode 1 (700 °C) at the ISTE-UNIL
Sample	Depth (m)	Mercury (ppb)	Mercury (ppm)	TOC (%)	Hg/TOC	Hg/Fe	Hg/Al	Hg/As	Fe2O3 (%)	Fe (%)	Fe (ppm)	Sed Rate (m.kyr-1)	Density	Mercury MAR
RQ25	2.4	31.35	0.03135	0.364583	0.0859887	9.89163e-07	6.50363e-07	0.0022234	4.53152	3.16935	31693.5	0.00108206	2.5	0.0848063
RQ30	2.9	7.6	0.0076	0.10454	0.0726995	1.38763e-06	9.06577e-07	0	0.783095	0.547697	5476.97	0.00633155	2.5	0.1203
RQ31	3	7.2	0.0072	0.100471	0.0716621	1.06349e-06	7.68795e-07	0.00126316	0.967996	0.677016	6770.16	0.0158268	2.5	0.284883
RQ32	3.1	36.25	0.03625	0.428213	0.0846541	1.08874e-06	7.36563e-07	0.00183081	4.76057	3.32955	33295.5	0.00113111	2.5	0.102506
RQ33	3.15	338.5	0.3385	2.08349	0.162468	2.51116e-06	4.93059e-06	0.00480824	19.2734	13.4798	134798	0.000686891	2.5	0.581282
RQ34	3.2	251.3	0.2513	4.02866	0.062378	3.63688e-06	2.93707e-06	0.00560938	9.87956	6.90976	69097.6	0.000679306	2.5	0.426774
RQ35	3.25	214.55	0.21455	3.43263	0.0625031	3.11353e-06	2.42451e-06	0.00544543	9.85259	6.8909	68909	0.000671986	2.5	0.360437
RQ36	3.3	284.85	0.28485	7.58559	0.0375515	4.47096e-06	3.3127e-06	0.00904286	9.10939	6.37111	63711.1	0.00072188	2.5	0.514069
RQ37	3.35	344.25	0.34425	5.83223	0.0590254	5.64017e-06	4.16407e-06	0.0123387	8.72683	6.10354	61035.4	0.000706331	2.5	0.607887
RQ38	3.4	27.1	0.0271	0.573607	0.0472449	2.38789e-06	2.39564e-06	0.00467241	1.62267	1.13489	11348.9	0.00391798	2.5	0.265443
RQ39	3.45	208.95	0.20895	3.67559	0.056848	2.70784e-06	2.34001e-06	0.00437134	11.033	7.71649	77164.9	0.000671704	2.5	0.350881
RQ40	3.5	247.95	0.24795	4.5182	0.054878	4.62998e-06	2.97166e-06	0.00876148	7.65701	5.35531	53553.1	0.000687164	2.5	0.425956
RQ41	3.57	64.4	0.0644	0.560659	0.114865	2.82673e-06	7.68399e-06	0.004025	3.25743	2.27825	22782.5	0.00299368	2.5	0.481982
RQ42	3.6	211.7	0.2117	3.8798	0.0545647	3.14213e-06	2.85161e-06	0.00366898	9.63323	6.73748	67374.8	0.000771179	2.5	0.408147
RQ43	3.625	36.8	0.0368	0.909037	0.0404824	1.80882e-06	2.05991e-06	0.00353846	2.90889	2.03448	20344.8	0.00345052	2.5	0.317448
RQ44	3.65	34.85	0.03485	0.814561	0.0427838	1.39806e-06	1.88816e-06	0.00322685	3.56411	2.49274	24927.4	0.00357621	2.5	0.311577
RQ45	3.675	22.9	0.0229	0.448779	0.0510274	2.08564e-06	2.66654e-06	0.00305333	1.56989	1.09798	10979.8	0.0053876	2.5	0.30844
RQ47	3.73	26.4	0.0264	0.272507	0.0968781	1.40493e-06	3.52787e-06	0.00347368	2.68673	1.8791	18791	0.00698087	2.5	0.460738
RQ49	3.82	106.75	0.10675	4.92703	0.0216662	2.64273e-06	1.55882e-06	0.0053375	5.77549	4.03938	40393.8	0.000972516	2.5	0.25954
RQ51	3.93	132.2	0.1322	4.61126	0.028669	3.38311e-06	2.41322e-06	0.0025229	5.58715	3.90765	39076.5	0.00105961	2.5	0.350202
RQ53	4	73.6	0.0736	5.2212	0.0140964	2.07027e-06	1.25543e-06	0.00359024	5.08307	3.5551	35551	0.00103361	2.5	0.190184
RQ55	4.15	78.6	0.0786	5.67025	0.0138618	1.72064e-06	1.10312e-06	0.00237462	6.53142	4.56808	45680.8	0.000871267	2.5	0.171204

## Sheet: Trace element
Trace element (XRF PANalytical AxiosmAX spectrometer fitted with a 4 kW Rh X-ray tube) University of Lausanne, ISTE
		U	V	Co	As	Mo	Cr	Mn	Ni	Cu	Zn	Ba	Zr	Ti	Al	Sr	S		U/Al	V/Al	Co/Al	As/Al	Mo/Al	Cr/Al	Mn/Al	Ni/Al	Cu/Al	Zn/Al	Ba/Al	Zr/Al	Ti/Al	Sr/Al	CaO	Ca (%)	Ca	Sr/Ca	Ba/Ca	Sr*/Ba*
sample	Depth (m)	(ppm)	(ppm)	(ppm)	(ppm)	(ppm)	(ppm)	(ppm)	(ppm)	(ppm)	(ppm)	(ppm)	(ppm)	(ppm)	(ppm)	(ppm)	%																%		(ppm)				Sample	Sed Rate (m.kyr-1)	Density	Sr MAR	Ba MAR	Ca MAR
RQ 25	2.4	4.2	86.8	34.6	14.1	1.6	69.1	608.4	87.9	20.9	24.1	140.4	91.5	2972.27	48203.9	238.4	0.274		8.713e-05	0.00180069	0.000717785	0.000292508	3.31924e-05	0.0014335	0.0126214	0.00182351	0.000433575	0.00049996	0.00291263	0.00189819	0.0616603	0.00494566	22.9704	16.4169	164169	0.00145216	0.000855215	1.69801	RQ25	0.00108206	2.5	0.644907	0.379802	444.102
RQ 30	2.9	6.1	12.9	2.5	0	0	15	1617.6	14.5	10.8	5.3	47.3	15.8	537.466	8383.18	183.6	0.15		0.000727648	0.0015388	0.000298216	0	0	0.0017893	0.192958	0.00172965	0.00128829	0.000632218	0.00564225	0.00188473	0.0641124	0.021901	48.7193	34.8196	348196	0.000527289	0.000135843	3.88161	RQ30	0.00633155	2.5	2.90618	0.748706	5511.56
RQ 31	3	4.2	18.2	3.8	5.7	1	15.8	1312.1	14.8	9.7	5.4	43.8	20.2	605.134	9365.31	170.4	0.214		0.000448464	0.00194334	0.000405753	0.000608629	0.000106777	0.00168708	0.140102	0.0015803	0.00103574	0.000576596	0.00467684	0.0021569	0.0646144	0.0181948	47.3902	33.8698	338698	0.000503104	0.000129319	3.89041	RQ31	0.0158268	2.5	6.74223	1.73304	13401.3
RQ 32	3.1	6.9	122.6	33.5	19.8	2.6	79.9	1239.8	83.7	20.1	28	178.2	107.3	3109.57	49215.1	279.3	0.204		0.000140201	0.00249111	0.000680686	0.000402316	5.28293e-05	0.00162349	0.0251915	0.0017007	0.000408411	0.000568931	0.00362084	0.00218023	0.0631833	0.00567509	24.2072	17.3009	173009	0.00161437	0.00103001	1.56734	RQ32	0.00113111	2.5	0.789795	0.503908	489.228
RQ 33	3.15	7.2	214.7	81.4	70.4	3.8	139.2	660.8	315.2	70	229.1	203.8	142.8	4046.22	68653.1	167.5	0.214		0.000104875	0.00312732	0.00118567	0.00102545	5.53508e-05	0.00202759	0.0096252	0.0045912	0.00101962	0.00333707	0.00296855	0.00208002	0.0589373	0.0024398	4.88975	3.4947	34947	0.00479297	0.00583168	0.821884	RQ33	0.000686891	2.5	0.287636	0.349971	60.012
RQ 34	3.2	9.5	243.5	51	44.8	9.6	104.3	192.6	186.5	52.7	116.3	291.1	205.5	6012.76	85561.5	424.5	1.047		0.000111031	0.00284591	0.000596063	0.0005236	0.0001122	0.00121901	0.00225101	0.00217972	0.000615931	0.00135926	0.00340223	0.00240178	0.0702741	0.00496134	0	0	0	0	0	0	RQ34	0.000679306	2.5	0.720913	0.494365	0
RQ 35	3.25	8.7	209.5	55.9	39.4	11	100.8	333.5	223.9	58.6	80	303.5	188.4	5720.13	88492.3	404.2	0.52		9.83137e-05	0.00236744	0.000631694	0.000445237	0.000124305	0.00113908	0.00376869	0.00253016	0.000662205	0.000904034	0.00342968	0.002129	0.0646398	0.00456763	0.0601816	0.0430118	430.118	0.939743	0.705621	1.3318	RQ35	0.000671986	2.5	0.679042	0.50987	0.722583
RQ 36	3.3	9.5	221.8	43.5	31.5	10.1	93.1	437.9	318.3	80.7	53.9	241.9	184.5	5633.12	85987.2	259.3	0.565		0.000110482	0.00257945	0.000505889	0.000366334	0.000117459	0.00108272	0.00509262	0.00370172	0.000938512	0.000626838	0.00281321	0.00214567	0.0655111	0.00301557	0.255558	0.182647	1826.47	0.141968	0.132441	1.07193	RQ36	0.00072188	2.5	0.467959	0.436557	3.29623
RQ 37	3.35	10.3	194.9	32.8	27.9	7.7	93.1	446.6	310.6	78.4	42.7	247.3	177.4	5465.08	82671.6	274	0.547		0.000124589	0.00235752	0.00039675	0.00033748	9.31396e-05	0.00112614	0.0054021	0.00375703	0.00094833	0.000516501	0.00299135	0.00214584	0.0661059	0.00331432	2.18171	1.55926	15592.6	0.0175724	0.01586	1.10797	RQ37	0.000706331	2.5	0.483837	0.436689	27.5339
RQ 38	3.4	5.7	37.5	3.5	5.8	2.3	15.9	1029.1	39.1	18.8	6.7	53.3	24.2	753.696	11312.2	164.6	0.368		0.000503879	0.003315	0.0003094	0.000512719	0.00020332	0.00140556	0.0909723	0.00345643	0.00166192	0.000592279	0.00471171	0.00213928	0.0666267	0.0145506	45.764	32.7075	327075	0.000503248	0.00016296	3.08818	RQ38	0.00391798	2.5	1.61225	0.522071	3203.69
RQ 39	3.45	8.4	197.3	30.4	47.8	11.2	104.5	259.5	196.8	82.2	60.1	391.9	183.5	5644.77	89294.6	310.8	0.368		9.40706e-05	0.00220954	0.000340446	0.000535307	0.000125428	0.00117028	0.00290611	0.00220394	0.000920548	0.000673053	0.00438884	0.002055	0.0632151	0.00348061	0.190075	0.135847	1358.47	0.228787	0.288487	0.793059	RQ39	0.000671704	2.5	0.521914	0.658102	2.28122
RQ 40	3.5	8.4	185.9	35.7	28.3	4.9	107	662.3	209.1	63.4	47.8	288.9	165	5033.77	83438.2	593.4	0.432		0.000100673	0.002228	0.000427862	0.000339173	5.87261e-05	0.00128239	0.00793761	0.00250605	0.000759844	0.000572879	0.00346244	0.00197751	0.0603293	0.00711185	4.09197	2.92453	29245.3	0.0202905	0.00987852	2.054	RQ40	0.000687164	2.5	1.01941	0.496305	50.2408
RQ 41	3.57	2.5	22.1	6.1	16	3.8	14.1	595.6	34.9	18.8	8.8	44.7	17.4	575.324	8381.07	192.7	0.9		0.000298291	0.0026369	0.000727831	0.00190907	0.000453403	0.00168236	0.0710649	0.00416415	0.00224315	0.00104999	0.00533345	0.00207611	0.0686456	0.0229923	45.4481	32.4817	324817	0.000593257	0.000137616	4.31096	RQ41	0.00299368	2.5	1.4422	0.334544	2430.99
RQ 42	3.6	8.1	224.7	56.9	57.7	14.9	136.2	597.5	253.6	111.3	75.7	331.9	207.5	4754.02	74238.8	383.5	0.231		0.000109107	0.00302672	0.000766446	0.000777222	0.000200704	0.00183462	0.00804836	0.00341601	0.00149922	0.00101968	0.00447071	0.00279504	0.0640369	0.00516576	7.97261	5.69802	56980.2	0.00673041	0.00582483	1.15547	RQ42	0.000771179	2.5	0.739368	0.639886	109.855
RQ 43	3.625	2.9	41.8	10.3	10.4	3.1	25.4	531.3	44.3	23.7	13.5	74.9	33.6	1096.84	17864.9	301	0.608		0.000162329	0.00233978	0.00057655	0.000582147	0.000173525	0.00142178	0.0297399	0.00247972	0.00132662	0.000755672	0.00419258	0.00188078	0.0613961	0.0168487	41.6079	29.7371	297371	0.0010122	0.000251874	4.01869	RQ43	0.00345052	2.5	2.59652	0.64611	2565.22
RQ 44	3.65	3.3	45.3	13.7	10.8	3.7	25.5	558.2	55.1	26.4	15.9	79.3	37.5	1182.61	18457.1	326.4	0.599		0.000178793	0.00245434	0.000742261	0.00058514	0.000200465	0.00138158	0.0302431	0.0029853	0.00143034	0.000861456	0.00429645	0.00203174	0.0640734	0.0176842	40.2999	28.8023	288023	0.00113324	0.000275325	4.11602	RQ44	0.00357621	2.5	2.91819	0.708983	2575.08
RQ 45	3.675	3	23.1	3.6	7.5	2.2	15.6	820.5	23.9	16.4	8.5	47.9	18.2	599.135	8587.92	204.4	0.527		0.000349328	0.00268982	0.000419193	0.00087332	0.000256174	0.0018165	0.0955412	0.00278298	0.00190966	0.000989762	0.0055776	0.00211926	0.0697649	0.0238009	46.3795	33.1474	331474	0.00061664	0.000144506	4.26722	RQ45	0.0053876	2.5	2.75306	0.645165	4464.62
RQ 47	3.73	2.7	20.6	8	7.6	3.5	16.2	689.6	28.9	18.5	8.3	43.8	15.8	529.746	7483.26	232.1	0.8		0.000360805	0.00275281	0.00106905	0.0010156	0.00046771	0.00216483	0.0921523	0.00386195	0.00247218	0.00110914	0.00585306	0.00211138	0.0707908	0.0310159	45.3799	32.433	324330	0.00071563	0.000135048	5.29909	RQ47	0.00698087	2.5	4.05065	0.764406	5660.26
RQ 49	3.82	9.9	131.7	19	20	4.3	88.5	469.2	68.9	60.4	38.8	226.3	127.5	4141.17	68481.2	1072.7	0.386		0.000144565	0.00192315	0.000277448	0.000292051	6.27909e-05	0.00129233	0.00685151	0.00100612	0.000881994	0.000566579	0.00330456	0.00186182	0.0604716	0.0156641	14.431	10.3138	103138	0.0104006	0.00219415	4.74017	RQ49	0.000972516	2.5	2.60805	0.550201	250.759
RQ 51	3.93	29.4	134	31.9	52.4	16.8	75.8	497	71.3	54.6	43.5	201.6	100.6	3286.75	54781.6	1559.7	0.295		0.000536676	0.00244608	0.000582312	0.000956525	0.000306672	0.00138368	0.00907238	0.00130153	0.000996684	0.000794062	0.00368007	0.00183638	0.0599974	0.0284712	21.6743	15.4906	154906	0.0100687	0.00130144	7.73661	RQ51	0.00105961	2.5	4.1317	0.534045	410.351
RQ 53	4	20.6	174.7	25.1	20.5	17.3	82.2	431.1	75.7	44.2	35.7	199.8	108.6	3494.85	58625.3	1407.6	0.443		0.000351384	0.00297994	0.000428143	0.000349679	0.000295095	0.00140213	0.00735349	0.00129125	0.000753941	0.000608952	0.00340809	0.00185244	0.0596133	0.0240101	19.5025	13.9384	139384	0.0100987	0.00143345	7.04505	RQ53	0.00103361	2.5	3.63727	0.516287	360.172
RQ 55	4.15	14.3	193.6	24.6	33.1	20.6	96.2	427.1	98.2	54.9	39.7	236.1	133.4	4245.11	71252.4	1031.4	0.369		0.000200695	0.0027171	0.000345252	0.000464546	0.000289113	0.00135013	0.00599418	0.0013782	0.0007705	0.000557174	0.00331357	0.00187222	0.0595785	0.0144753	13.4091	9.58346	95834.6	0.0107623	0.00246362	4.36849	RQ55	0.000871267	2.5	2.24656	0.514265	208.744
	Mean	8.44545	125.327	27.6273	25.9773	7.09091	68.7909	655.332	125.236	45.25	44.9	178.077	104.827	3156.34	49942.3	462.795
	Standard deviation	6.16933	81.9923	20.6027	18.7915	5.83484	41.5812	345.647	102.975	27.8904	48.9828	106.963	69.5251	2010.86	31451.9	403.443
	Coefficient of variation	0.730491	0.654226	0.745737	0.723382	0.822862	0.604458	0.527439	0.822244	0.616363	1.09093	0.600654	0.663235	0.637085	0.629765	0.871753

## Sheet: Major element
Major element (XRF PANalytical AxiosmAX spectrometer fitted with a 4 kW Rh X-ray tube) University of Lausanne, ISTE
	Depth	SiO2	TiO2	Al2O3	Fe2O3	MnO	MgO	CaO	Na2O	K2O	P2O5	Cr2O3	NiO	LOI	Sum	CIA	WIP
	(m)	%	%	%	%	%	%	%	%	%	%	%	%	%	%
RQ 1	0	32.9834	0.540205	10.4877	4.04382	0.0771721	1.68235	22.9819	0.0926066	3.0483	0.0617377	0.00771721	0.0385861	22.4946	98.541	76.4342	2731.4
RQ 5	0.4	16.429	0.253164	4.79013	2.84477	0.0866088	1.03931	39.0939	0.0666222	1.4457	0.0266489	0.00666222	0.0333111	33.1242	99.266	75.2092	1348.18
RQ 10	0.9	16.9841	0.2615	4.96851	2.92344	0.0871668	1.0393	38.6082	0.0603463	1.48854	0.0335257	0.00670514	0.0335257	32.6751	99.191	75.5352	1375.28
RQ 15	1.4	46.1755	0.720957	14.3247	5.90498	0.0600797	2.38602	9.77583	0.111577	4.4459	0.094411	0.00858282	0.0514969	13.8799	97.948	75.418	3949.35
RQ 20	1.9	24.5297	0.364409	6.76658	3.28683	0.114324	1.8149	31.9465	0.078598	2.20075	0.0428717	0.00714528	0.0428717	28.4445	99.627	74.1582	2052.08
RQ 25	2.4	31.4918	0.495874	9.10882	4.53152	0.106804	2.94473	22.9704	0.0915459	2.91421	0.0457729	0.00762882	0.0762882	23.2446	98.029	74.625	2763.18
RQ 30	2.9	5.12897	0.0896673	1.58412	0.783095	0.227157	0.950474	48.7193	0.0418448	0.286936	0.681472	0.00597782	0.0179335	39.3731	97.885	81.0398	382.979
RQ 31	3	5.91487	0.100957	1.76971	0.967996	0.184097	0.920487	47.3902	0.0296931	0.415704	0.0296931	0.00593863	0.0178159	39.4928	97.234	78.836	468.774
RQ 32	3.1	31.2031	0.51878	9.2999	4.76057	0.183099	2.02172	24.2072	0.114437	2.89907	0.213615	0.00762912	0.061033	23.4598	98.956	74.8312	2674.67
RQ 33	3.15	41.0739	0.675046	12.973	19.2734	0.112508	1.78281	4.88975	0.129816	3.94642	0.415413	0.00865443	0.23367	13.2956	98.813	75.5164	3503.59
RQ 34	3.2	49.6844	1.00313	16.1681	9.87956	0.0421483	1.60163	0	0.134874	4.88077	0.295038	0.00842966	0.134874	15.6171	99.436	75.8403	4236.72
RQ 35	3.25	50.5955	0.954309	16.7219	9.85259	0.0601816	1.76246	0.0601816	0.146155	4.85752	0.249324	0.00859737	0.16335	13.9379	99.37	76.4544	4248.88
RQ 36	3.3	47.9624	0.939793	16.2485	9.10939	0.0741941	1.81363	0.255558	0.131901	4.70721	0.370971	0.00824379	0.222582	17.4356	99.273	76.5734	4118.02
RQ 37	3.35	46.3368	0.911758	15.622	8.72683	0.0732663	1.75025	2.18171	0.130251	4.54251	0.496583	0.0081407	0.219799	18.5001	99.522	76.4847	3977.34
RQ 38	3.4	6.67629	0.125742	2.13761	1.62267	0.149693	0.862229	45.764	0.0299385	0.568832	0.059877	0.0059877	0.0299385	38.8872	96.922	77.2727	585.084
RQ 39	3.45	49.6269	0.941737	16.8735	11.033	0.0518387	1.88347	0.190075	0.138237	4.87284	0.41471	0.00863979	0.146876	13.5681	99.747	76.6183	4265.53
RQ 40	3.5	46.2302	0.839801	15.7668	7.65701	0.0988001	1.8278	4.09197	0.131733	4.67654	0.279934	0.00823334	0.1482	17.5429	99.293	76.1431	4094.87
RQ 41	3.57	4.96113	0.0959833	1.58372	3.25743	0.0899843	0.809859	45.4481	0.0239958	0.389932	0.0479916	0.00599895	0.0299948	37.8459	94.595	78.3383	429.354
RQ 42	3.6	43.0273	0.79313	14.0285	9.63323	0.074356	1.70193	7.97261	0.115665	4.19698	0.156974	0.00826177	0.132188	17.2189	99.071	76.0072	3678.88
RQ 43	3.625	10.8594	0.182989	3.37583	2.90889	0.0820295	1.06638	41.6079	0.0315498	0.984355	0.0567897	0.00630996	0.0378598	35.7897	96.989	76.3195	942.028
RQ 44	3.65	11.5515	0.197299	3.48774	3.56411	0.0891028	1.10106	40.2999	0.0381869	1.02468	0.0636449	0.00636449	0.0445514	35.1118	96.585	76.0055	985.728
RQ 45	3.675	5.06247	0.0999558	1.62281	1.56989	0.123475	0.905482	46.3795	0.023519	0.376304	0.0411583	0.00587975	0.023519	39.406	95.641	79.3103	428.531
RQ 47	3.73	4.43076	0.0883794	1.41407	2.68673	0.100163	0.895578	45.3799	0.0235679	0.312274	0.0412437	0.00589196	0.0235679	38.6279	94.028	79.7342	376.263
RQ 49	3.82	37.8434	0.690886	12.9405	5.77549	0.0776276	1.59913	14.431	0.13973	3.70284	0.13973	0.00776276	0.0465766	22.3053	99.69	76.4679	3299.64
RQ 51	3.93	29.4326	0.548341	10.3518	5.58715	0.0815101	1.28193	21.6743	0.11856	2.88249	0.896611	0.00741001	0.0518701	25.4855	98.403	76.8427	2583.93
RQ 53	4	31.9112	0.583057	11.0781	5.08307	0.074751	1.41279	19.5025	0.119602	3.13954	0.612958	0.0074751	0.0523257	24.8526	98.422	76.6287	2805.3
RQ 55	4.15	38.2757	0.708226	13.4642	6.53142	0.0708226	1.6604	13.4091	0.180991	3.72212	0.338375	0.00786918	0.0708226	21.24	99.685	76.7265	3369.03
RQ 60	4.45	30.1698	0.538746	10.7218	6.38907	0.0910556	1.41895	21.3146	0.128995	3.01242	0.538746	0.00758797	0.0607037	23.6476	98.048	76.6269	2715.02
RQ 65	4.7	31.7121	0.573974	11.2605	5.54338	0.0906275	1.4727	19.6964	0.120837	3.12665	0.26433	0.00755229	0.0755229	23.9656	97.902	76.9747	2803.05
RQ 70	5	15.1724	0.272675	5.23276	2.49303	0.103876	0.889439	37.746	0.0843993	1.10368	0.136337	0.00649226	0.0454458	34.1935	97.475	80.4391	1078.23
RQ 75	5.25	34.1422	0.617028	12.4475	15.5162	0.0987246	1.43151	10.6293	0.172768	3.39777	0.403125	0.00822705	0.106952	17.0186	96.016	76.8801	3074.72
RQ 80	5.5	4.26708	0.0869649	1.61755	1.43782	0.220311	0.707314	46.4856	0.0521789	0.27249	0.0463813	0.00579766	0.0231906	40.0273	95.238	81.1047	356.216
RQ 85	5.8	35.5778	0.632743	13.656	5.43838	0.12815	1.77809	17.4765	0.104122	3.70034	0.384451	0.0080094	0.0560658	19.6193	98.565	77.7474	3276.84
RQ 90	6.3	34.6943	0.609088	14.3492	4.48511	0.118654	1.66115	19.0637	0.102833	3.58334	0.205666	0.00791024	0.0474614	20.8516	99.789	79.1103	3168.77
	max	50.5955	1.00313	16.8735	19.2734	0.227157	2.94473	48.7193	0.180991	4.88077	0.896611	0.00865443	0.23367	40.0273	99.789	81.1047	4265.53
	min	4.26708	0.0869649	1.41407	0.783095	0.0421483	0.707314	0	0.023519	0.27249	0.0266489	0.00579766	0.0178159	13.2956	94.028	74.1582	356.216
